# Supplementary material for: A Natural mtDNA Polymorphism in Complex III Is a Modifier of Healthspan in Mice
Source: MDPI journal article supplement (doi:10.3390/ijms20092359), 2019-05-13
Supplement: s1 [file s1]

Supplementary data

A Natural mtDNA Polymorphism in Complex III Is a Modifier of Healthspan in Mice

Supplementary figures

Supplementary figure 1

A

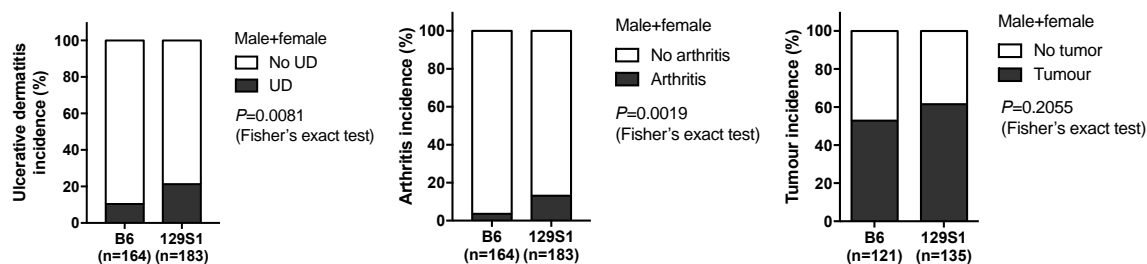

B

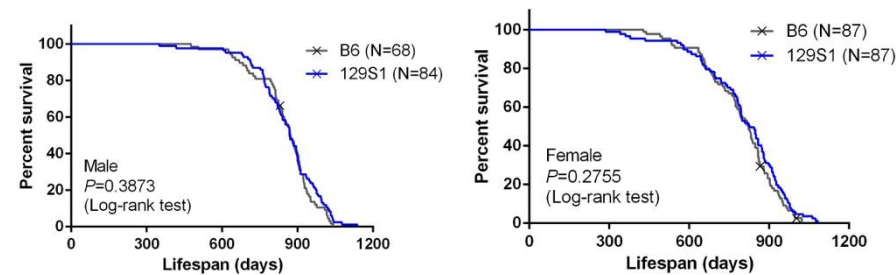

C

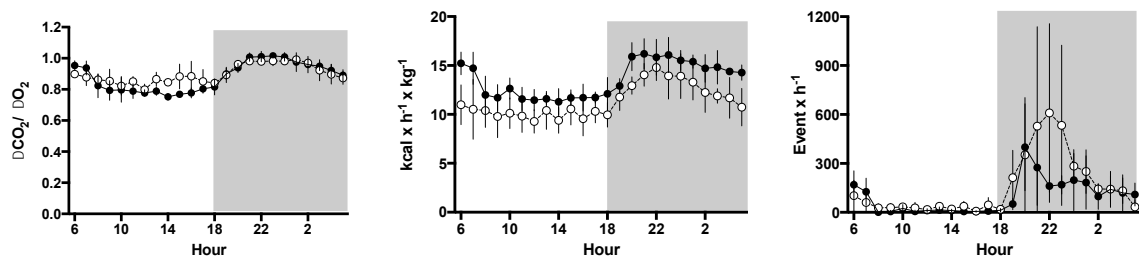

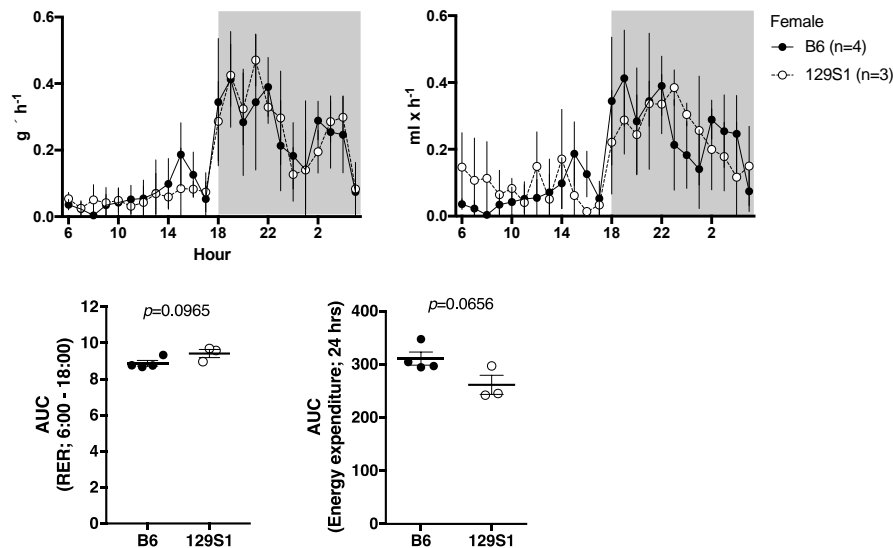

**Supplementary Figure S1: The polymorphism m.15124A>G in the *mt-Cytb* gene does affect the health span but not the lifespan in mice with C57BL/6J nuclear background in this study. (A)** Incidences of spontaneously occurring ulcerative dermatitis (UD), spontaneous arthritis, and tumor were evaluated in C57BL/6J and C57BL/6J-*mt*<sup>129S1/SvlmJ</sup> mice. Of 183 C57BL/6J-*mt*<sup>129S1/SvlmJ</sup> mice evaluated, 39 mice with UD and 24 with arthritis were observed, while 17 with UD and six with arthritis were found among 164 C57BL/6J mice. Tumors were identified in 83 of 135 C57BL/6J-*mt*<sup>129S1/SvlmJ</sup> mice and in 64 of 121 C57BL/6J mice. **(B)** Lifespan was observed on mice, which were kept under normal condition (normal chow, 12 h light-/dark-cycle). The median survival in males was 871.0 (C57BL/6J) and 869.5 (C57BL/6J-*mt*<sup>129S1/SvlmJ</sup>) days, and in females this was 822.0 (C57BL/6J) and 827.0 (C57BL/6J-*mt*<sup>129S1/SvlmJ</sup>). **(C)** Indirect calorimetric cage analysis reveals a moderate decrease of energy expenditure in C57BL/6J-*mt*<sup>129S1/SvlmJ</sup> mice ( $n = 3$ ) compared with C57BL/6J mice ( $n = 4$ ). Female, 3 months old. Time plot of respiratory exchange ratio (RER;  $\Delta\text{CO}_2/\Delta\text{O}_2$ ), energy expenditure, ( $\text{kcal} \times \text{kg}^{-1} \times \text{h}^{-1}$ ) locomotor activity measured by infrared ( $\text{Event} \times \text{h}^{-1}$ ), food intake ( $\text{g} \times \text{h}^{-1}$ ), and water intake ( $\text{ml} \times \text{h}^{-1}$ ). No statistical significance was observed between the strains ( $p = 0.3144$ ,  $p = 0.0509$ ,  $p = 0.3561$ ,  $p = 0.9416$ , and  $p = 0.8204$ , respectively, two-way ANOVA). The area under the curve of RER during resting period (6:00 to 18:00) and that of energy expenditure values (whole day) of individual mice was plotted.  $p = 0.0965$  (RER),  $p = 0.0656$  (energy expenditure); unpaired  $t$ -test. B6, C57BL/6J; 129S1, C57BL/6J-*mt*<sup>129S1/SvlmJ</sup>.

## Supplementary figure 2

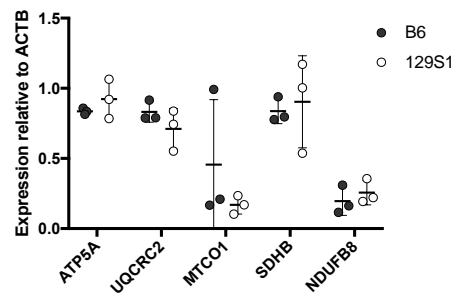

**Supplementary Figure S2:** Levels of OXPHOS complex protein expression in the liver tissue were comparable between C57BL/6J- $\text{mt}^{129\text{S1}/\text{SvImJ}}$  and C57BL/6J mice. Expression of each OXPHOS protein was normalized with that of beta actin (ACTB).  $n = 3/\text{strain}$ .  $p > 0.05$  for each protein; multiple  $t$ -test. B6, C57BL/6J; 129S1, C57BL/6J- $\text{mt}^{129\text{S1}/\text{SvImJ}}$ .

## Supplementary figure 3

**A**

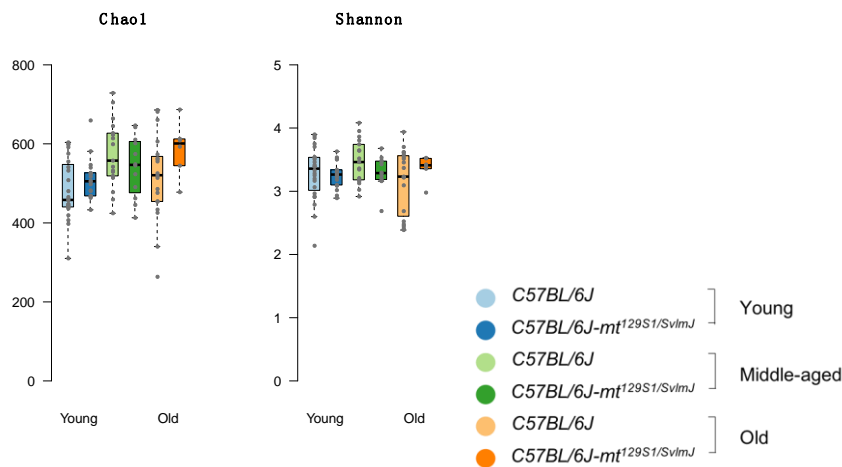

**B**

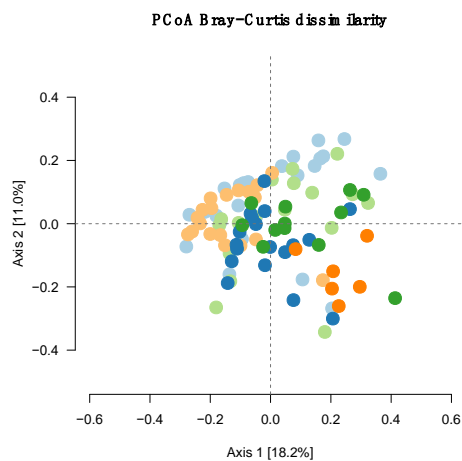

**Supplementary Figure S3: Figures related to Figure 3. (A)** Alpha diversity (Chao1 and Shannon index) was tested to evaluate the richness and evenness of gut microbiota between groups. No difference was observed in both analyses. **(B)** Beta diversity, using Bray–Curtis dissimilarity, was significantly different, as shown in the main text. A goodness-of-fit test of the PCoA revealed that all variables but age significantly correlated with difference in microbiota composition ( $r^2_{\text{age}} = 0.0478$ ,  $p_{\text{age}} = \text{n.s.}$ ;  $r^2_{\text{strain}} = 0.1093$ ,  $p_{\text{strain}} = 0.0002$ ;  $r^2_{\text{strain:age}} = 0.2671$ ,  $p_{\text{strain:age}} = 0.0001$ ). The figure presented here includes all age group samples presented in **Figure 3A**. Color codes: Lighter colors, C57BL/6J; darker colors, C57BL/6J-mt<sup>129S1/SvlmJ</sup>, blues, young; greens, middle age; oranges, old.

## Supplementary tables

**Supplementary Table S1: List of mtDNA variations in C57BL/6J-mt<sup>129S1/SvImJ</sup> and C57BL/6J.**

| Position                           | 9461          | 9821         | 15124          |
|------------------------------------|---------------|--------------|----------------|
| Strain/Gene                        | <i>mt-Nd3</i> | <i>mt-Tr</i> | <i>mt-Cytb</i> |
| C57BL/6J                           | T             | 8A           | A              |
| C57BL/6J-mt <sup>129S1/SvImJ</sup> | C             | 9A           | G              |
| Amino acid change                  | Met-Met       | -            | Ile-Val        |

**Supplementary Table S2: Nuclear genome homology of C57BL/6J-mt<sup>129S1/SvimJ</sup> to C57BL/6J.**

| Strain                        |           |                   | C57BL/6J   |            |            | C57BL/6J-mt <sup>129S1/SvimJ</sup> |              |              |              |              |              |
|-------------------------------|-----------|-------------------|------------|------------|------------|------------------------------------|--------------|--------------|--------------|--------------|--------------|
| Mouse ID                      |           |                   | 70015      | 70012      | 70004      | 31821                              | 31890        | 34685        | 35865        | 34664        | 31817        |
| Sex                           |           |                   | M          | F          | F          | M                                  | F            | M            | M            | F            | F            |
| ChrB37                        | PosB37    | SNPs              |            |            |            |                                    |              |              |              |              |              |
| 1                             | 42424440  | B6_rs31362610     | TT         | TT         | TT         | <b>TC</b>                          | TT           | TT           | <b>TC</b>    | <b>TC</b>    | TT           |
| 1                             | 156715218 | UNC010465120      | TT         | TT         | TT         | TT                                 | <b>TC</b>    | <b>N.D.*</b> | TT           | TT           | TT           |
| 3                             | 84097284  | UNC030314030      | GG         | GG         | GG         | <b>GA</b>                          | GG           | <b>GA</b>    | <b>GA</b>    | GG           | GG           |
| 3                             | 120369799 | B6_03-120369799-S | AA         | AA         | AA         | AA                                 | <b>AG</b>    | <b>AG</b>    | <b>AG</b>    | <b>AG</b>    | AA           |
| 3                             | 121531310 | UNC030194728      | CC         | CC         | CC         | CC                                 | <b>CT</b>    | <b>CT</b>    | <b>CT</b>    | <b>CT</b>    | CC           |
| 5                             | 18216206  | B6_rs33367397     | AA         | AA         | AA         | AA                                 | <b>AG</b>    | <b>AG</b>    | <b>AG</b>    | <b>AG</b>    | AA           |
| 5                             | 118166937 | B6_rs29730106     | AA         | AA         | AA         | AA                                 | <b>AG</b>    | <b>N.D.*</b> | AA           | <b>AG</b>    | <b>N.D.*</b> |
| 5                             | 136917666 | B6_rs29500641     | TT         | TT         | TT         | TT                                 | <b>TG</b>    | <b>TG</b>    | <b>TG</b>    | <b>TG</b>    | <b>TG</b>    |
| 7                             | 78961795  | B6_rs32060039     | CC         | CC         | CC         | <b>CG</b>                          | <b>CG</b>    | <b>CG</b>    | <b>CG</b>    | <b>CG</b>    | CC           |
| 7                             | 125077242 | B6_rs32062246     | AA         | AA         | AA         | AA                                 | AA           | AA           | AA           | <b>AG</b>    | AA           |
| 8                             | 26496123  | B6_rs33539160     | AA         | AA         | AA         | AA                                 | <b>AG</b>    | AA           | AA           | AA           | AA           |
| 8                             | 77477256  | B6_rs32729089     | TT         | TT         | TT         | TT                                 | <b>TA</b>    | TT           | <b>TA</b>    | TT           | TT           |
| 8                             | 120161891 | B6_rs32661424     | CC         | CC         | CC         | <b>CT</b>                          | <b>CT</b>    | <b>CT</b>    | <b>CT</b>    | CC           | CC           |
| 9                             | 6238770   | B6_09-006238770-S | AA         | AA         | AA         | <b>AG</b>                          | AA           | AA           | <b>AG</b>    | AA           | AA           |
| 10                            | 56034586  | B6_rs29377979     | GG         | GG         | GG         | <b>GA</b>                          | GG           | GG           | <b>GA</b>    | <b>GA</b>    | <b>GA</b>    |
| 10                            | 79915030  | B6_rs29349055     | AA         | AA         | AA         | AG                                 | AA           | <b>AG</b>    | AA           | <b>AG</b>    | <b>AG</b>    |
| 10                            | 116077282 | UNC100129834      | TT         | TT         | TT         | <b>TC</b>                          | TT           | <b>TC</b>    | TT           | <b>TC</b>    | <b>TC</b>    |
| 10                            | 121868277 | B6_rs29348001     | AA         | AA         | AA         | <b>AG</b>                          | AA           | <b>AG</b>    | AA           | <b>AG</b>    | <b>AG</b>    |
| 11                            | 87932613  | UNC20071212       | CC         | CC         | CC         | <b>CT</b>                          | <b>CT</b>    | <b>N.D.*</b> | CC           | <b>CT</b>    | CC           |
| 12                            | 80337517  | B6_12-080337517-S | TT         | TT         | TT         | <b>TC</b>                          | <b>TC</b>    | <b>TC</b>    | <b>TC</b>    | <b>TC</b>    | <b>TC</b>    |
| 12                            | 99208162  | B6_rs29206394     | AA         | AA         | AA         | <b>AC</b>                          | <b>AC</b>    | AA           | <b>AC</b>    | <b>AC</b>    | <b>AC</b>    |
| 14                            | 22151051  | B6_rs31151615     | TT         | TT         | TT         | <b>TC</b>                          | <b>TC</b>    | <b>N.D.*</b> | <b>TC</b>    | TT           | TT           |
| 14                            | 22662231  | UNC140101805      | AA         | AA         | AA         | <b>AC</b>                          | <b>AC</b>    | <b>N.D.*</b> | <b>AC</b>    | AA           | AA           |
| 17                            | 60378784  | B6_rs33169019     | AA         | AA         | AA         | <b>AG</b>                          | <b>AG</b>    | AA           | AA           | <b>AG</b>    | <b>AG</b>    |
| 18                            | 15323094  | UNC180052085      | AA         | AA         | AA         | <b>AG</b>                          | <b>AG</b>    | <b>N.D.*</b> | <b>AG</b>    | AA           | AA           |
| 18                            | 15408257  | B6_rs13483221     | CC         | CC         | CC         | <b>CT</b>                          | <b>CT</b>    | <b>CT</b>    | <b>CT</b>    | CC           | CC           |
| nDNA homology to C57BL/6J (%) |           |                   | <b>100</b> | <b>100</b> | <b>100</b> | <b>99.98</b>                       | <b>99.98</b> | <b>99.98</b> | <b>99.98</b> | <b>99.98</b> | <b>99.99</b> |

\*N.D.; no data due to the genotyping errors.
